# Supplementary material for: Engendering High Energy Density LiFePO4 Electrodes with Morphological and Compositional Tuning
Source: MDPI journal article supplement (doi:10.3390/nano13111771), 2023-05-31
Supplement: s1 [file s1]

## Supplementary Materials

### Engendering High Energy Density $\text{LiFePO}_4$ Electrodes with Morphological and Compositional Tuning

Aleksei V. Kubarkov,<sup>a,\*</sup> Alexander V. Babkin,<sup>a</sup> Oleg A. Drozhzhin,<sup>a,b</sup> Keith J. Stevenson,<sup>a</sup>

Evgeny V. Antipov,<sup>a,b</sup> and Vladimir G. Sergeyev<sup>a,\*</sup>

<sup>a</sup> Department of Chemistry, Lomonosov Moscow State University,  
Leninskie Gory 1-3, 119991 Moscow, Russia;

<sup>b</sup> Center for Energy Science and Technology, Skolkovo Institute of Science and Technology,  
Bolshoy Boulevard 30 bld. 1, 121205 Moscow, Russia

\* Corresponding authors: [aleksei.kubarkov@gmail.com](mailto:aleksei.kubarkov@gmail.com), [sergeyev@genebee.msu.ru](mailto:sergeyev@genebee.msu.ru)

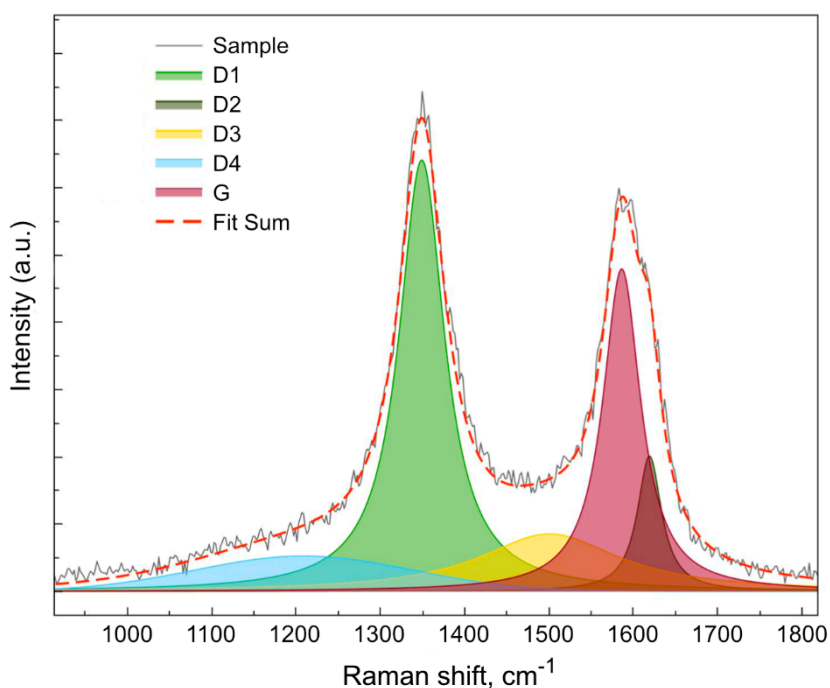

**Figure S1.** Typical first-order Raman spectrum of the surface of an Al-C current collector. The spectrum was fitted with four Lorentzian-shape bands (D1, D2, D4 and G) and a Gaussian-shape band (D3).

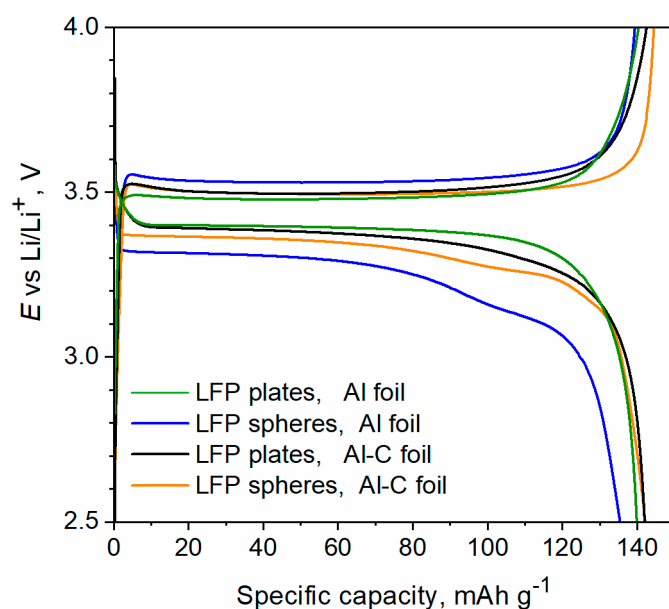

**Figure S2.** Galvanostatic charge and discharge profiles (1C-rate) for the composite electrodes prepared with different types of LFP particles and different current collectors.

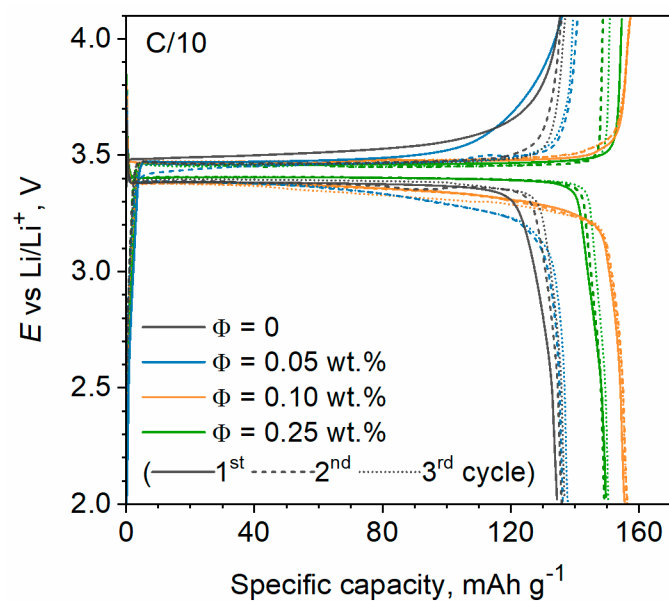

**Figure S3.** Galvanostatic charge and discharge profiles of the first three cycles of the composite electrodes with different SWCNT contents ( $\Phi$ ).

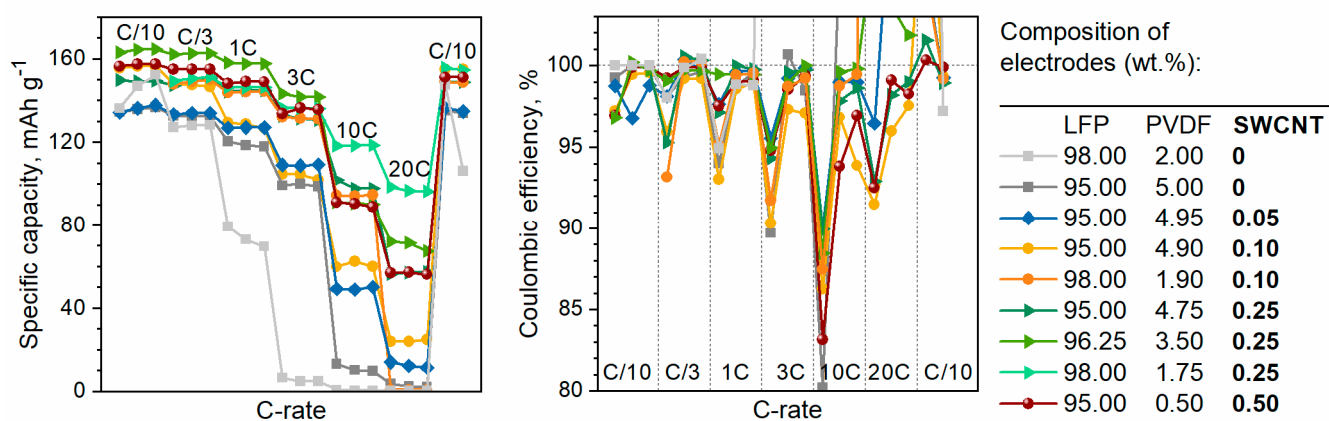

**Figure S4.** Rate performance of the composite electrodes containing different amounts of LFP (spherical), PVDF, and SWCNT.

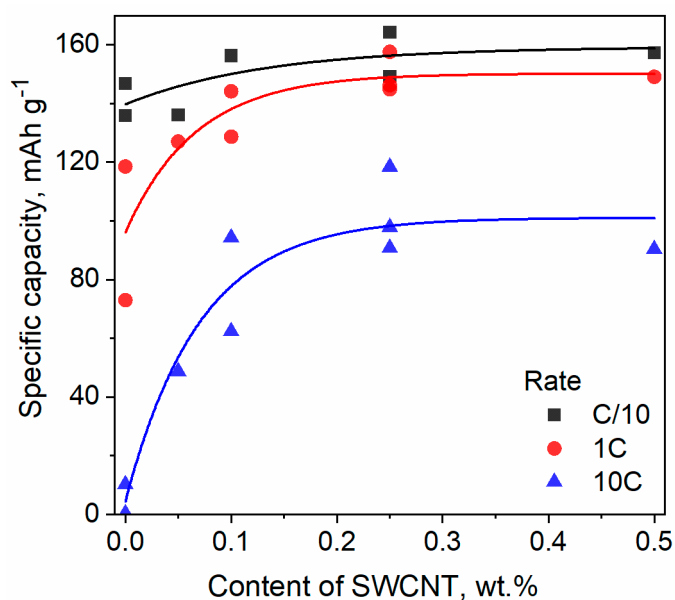

**Figure S5.** Effect of SWCNT content on the capacity of LFP-based composite electrodes. The composition of the studied electrodes is shown in Figure S4.

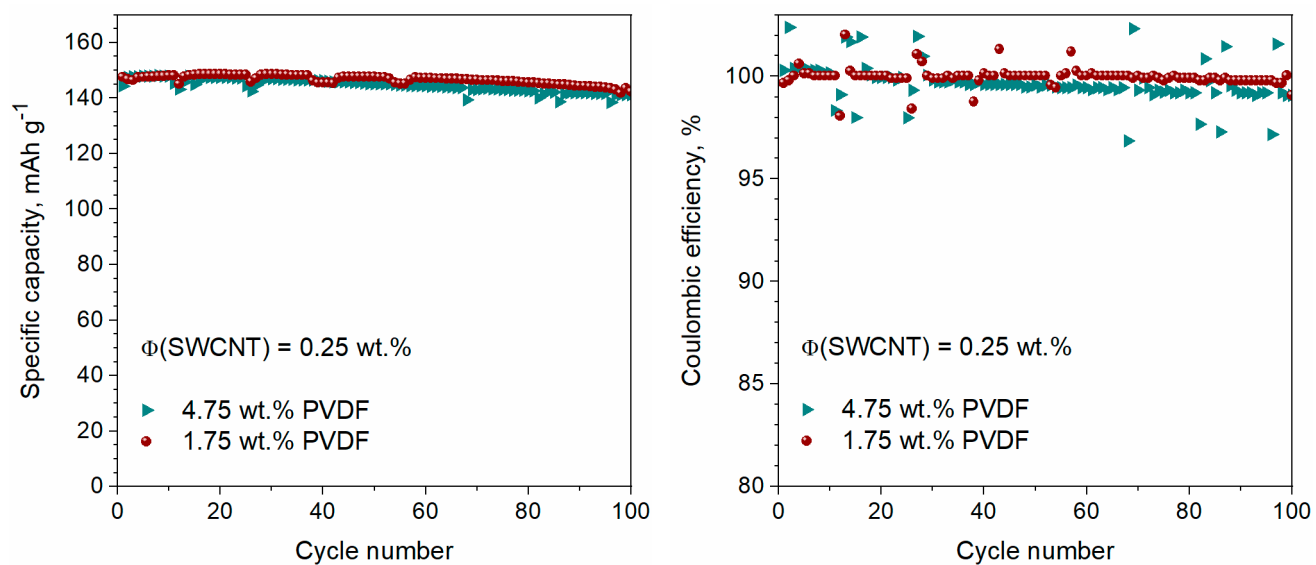

**Figure S6.** Cycling performance of the electrodes with different contents of PVDF binder.
